# Supplementary material for: Transcriptional repression of cancer stem cell marker CD133 by tumor suppressor p53
Source: PubMed Central journal article supplement (PMC4670923; doi:10.1038/cddis.2015.313), 2015-11-05

## Supplementary Figure 2

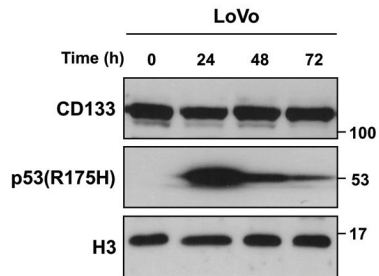

Supplement: cddis2015313x4.pdf [file cddis2015313x4.pdf]
