# Supplementary material for: Transcriptional repression of cancer stem cell marker CD133 by tumor suppressor p53
Source: PubMed Central journal article supplement (PMC4670923; doi:10.1038/cddis.2015.313), 2015-11-05

# Supplementary Figure 3

**a**

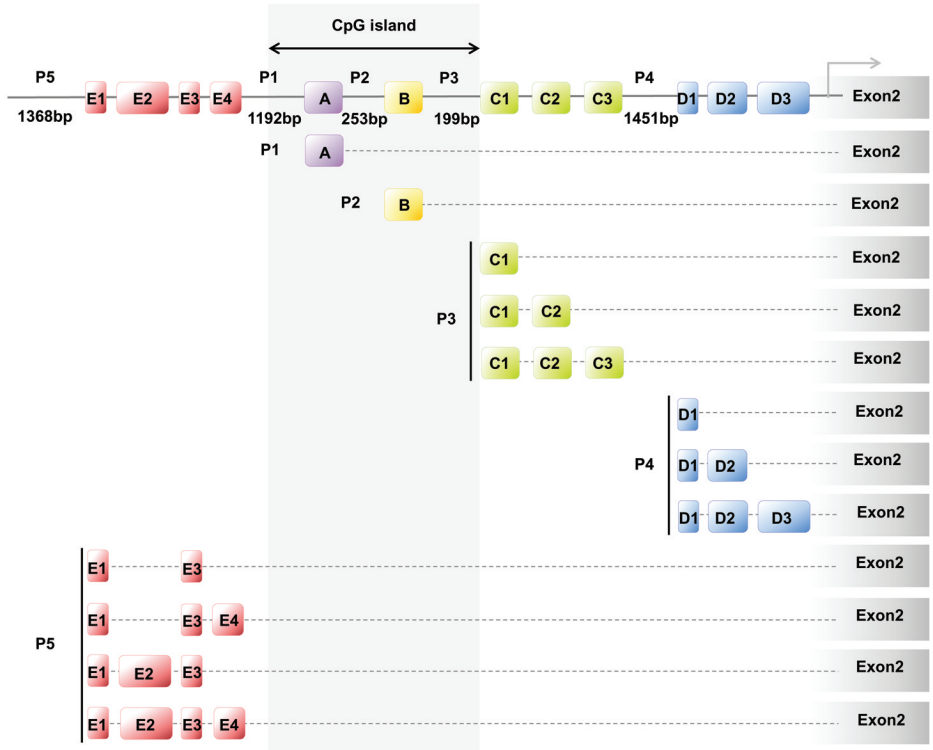

**b**

|                                                           |                                                        |
|-----------------------------------------------------------|--------------------------------------------------------|
| <b>Canonical p53 binding site</b>                         |                                                        |
| $\overleftarrow{\text{PuPuPuC(A/T) (A/T)GPyPyPy}}$        |                                                        |
| <b>Non-canonical p53 binding site in CD44 promoter</b>    |                                                        |
| $\overrightarrow{\text{CCAGT G GGGCT CGG AGGCA C AGGCA}}$ |                                                        |
| <b>Potential p53 binding site in CD133 promoter</b>       |                                                        |
| *WT1                                                      | $\overrightarrow{\text{AGCCAAACCA TCT AACCT TGCCA}}$   |
| (-971)                                                    | (-750)                                                 |
| *MT1                                                      | $\overrightarrow{\text{ATCCA AACTA TCT ATCCT TGCAA}}$  |
| (-971)                                                    | (-750)                                                 |
| *WT2                                                      | $\overrightarrow{\text{AAACA C CTGCT GT ATGCT AGACA}}$ |
| (-714)                                                    | (-690)                                                 |
| *MT2                                                      | $\overrightarrow{\text{AAATA C CTGAT GT ATGAT AGATA}}$ |
| (-714)                                                    | (-690)                                                 |

**c**

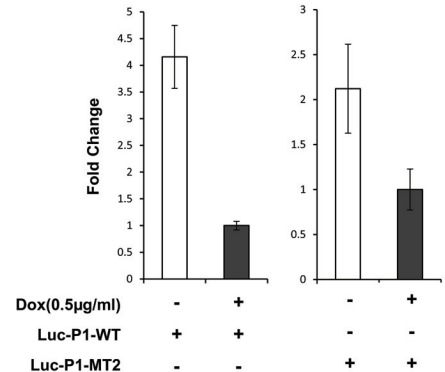

Supplement: cddis2015313x5.pdf [file cddis2015313x5.pdf]
